# Supplementary material for: An intermolecular-split G-quadruplex DNAzyme sensor for dengue virus detection
Source: Royal Society of Chemistry journal article supplement (doi:10.1039/d0ra05439a), 2020-01-01
Supplement: d0ra05439a1.pdf [file d0ra05439a1.pdf]

## Supplementary Materials

Table S1 - Oligonucleotide sequences used for split mode optimization. The underline bases are G4-forming segments.

| Oligonucleotide           | Sequence (5'-3')                                 |
|---------------------------|--------------------------------------------------|
| DENV1 Probe A (6 guanine) | <u>GGG</u> AT GGG ATG TCA GTG ATT TTA GCC        |
| DENV1 Probe B (6 guanine) | GCA TGT TCG GGC TCC ATG <u>GGG TT GGG</u>        |
| DENV2 Probe A (6 guanine) | <u>GGG</u> AT GGG TGA TTT GTT ACC ATT TCT        |
| DENV2 Probe B (6 guanine) | TTG TGT TCT CCT TTC ATG <u>GGG TT GGG</u>        |
| DENV3 Probe A (6 guanine) | <u>GGG</u> AT <u>GGG</u> TGC TGC GTG ATT TTT TCC |
| DENV3 Probe B (6 guanine) | CTG TGT TCG GGG TCC ATT <u>GGG TT GGG</u>        |
| DENV3 Probe A (4 guanine) | G AT GGG TGC TGC GTG ATT TTT TCC                 |
| DENV3 Probe B (8 guanine) | CTG TGT TCG GGG TCC ATT <u>GGG TT GGG TT GG</u>  |
| DENV4 Probe A (6 guanine) | <u>GGG</u> AT <u>GGG</u> TGT TCC GTG ATC AGT TCC |
| DENV4 Probe B (6 guanine) | TTG TGG TGG GGA GCC ATC <u>GGG TT GGG</u>        |

Table S2 - Oligonucleotide sequences of other flaviviruses used in cross-reactivity test.

| Oligonucleotide    | Sequence (5'-3')                                |
|--------------------|-------------------------------------------------|
| Zika virus         | AGC CTT GAT TAC TTA CCA AAT GGA TGA AGG GCA CAG |
| Yellow fever virus | ACA GGA GAT CTT GAA CTA CAT GAG CCC ACA TCA CAA |

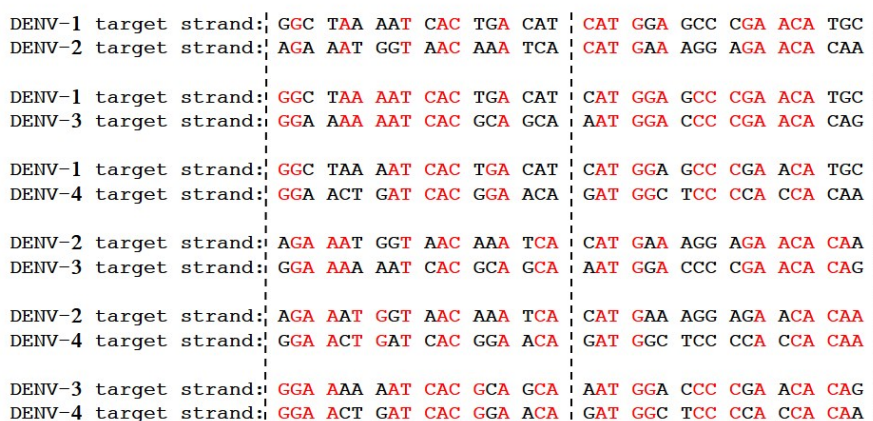

(a)

(b)

Figure S1 - Red bases show the homologous sequences among DENV serotypes. (a) Region annealing to Probe A and (b) Region annealing to Probe B.
